# Supplementary material for: Amino-substituted spirothiopyran as an initiator for self-assembly of gold nanoparticles
Source: Royal Society of Chemistry journal article supplement (doi:10.1039/c5ra14752b), 2015-01-01
Supplement: c5ra14752b1.pdf [file c5ra14752b1.pdf]

## Amino-substituted spirothiopyran as an initiator for self-assembly of gold nanoparticles

Yasuhiro Shiraishi,<sup>a,b\*</sup> Haruki Tanaka,<sup>a</sup> Hirokatsu Sakamoto,<sup>a</sup>  
Satoshi Ichikawa<sup>c</sup> and Takayuki Hirai<sup>a</sup>

[a] Research Center for Solar Energy Chemistry, and Division of Chemical Engineering,  
Graduate School of Engineering Science, Osaka University, Toyonaka 560-8531, Japan

[b] PRESTO, JST, Saitama 332-0012, Japan

[c] Institute for NanoScience Design, Osaka University, Toyonaka 560-8531, Japan

\* shiraish@cheng.es.osaka-u.ac.jp

### Electronic Supplementary Information (ESI†)

#### CONTENTS

|                                                                | page |
|----------------------------------------------------------------|------|
| <b>Fig. S1</b> <sup>1</sup> H NMR chart of <b>2</b> .....      | 2    |
| <b>Fig. S2</b> <sup>13</sup> C NMR chart of <b>2</b> .....     | 3    |
| <b>Fig. S3</b> FAB-MS chart of <b>2</b> .....                  | 4    |
| <b>Fig. S4</b> Absorption spectra of <b>2</b> .....            | 5    |
| <b>Fig. S5</b> Absorption spectra of AuNPs with <b>2</b> ..... | 5    |
| <b>Table S1</b> TD-DFT calculation results for <b>2</b> .....  | 6    |
| <b>Cartesian coordinates for respective compounds</b> .....    | 7    |

```

DTITLE ST-NH2 Proton-1-11&u.als
COMNT single_pulse
DATIM 2013-12-17 13:31:22
OBNUC 1H
EXMOD proton.fxp
OBFREQ 399.78 MHz
OBSET 4.19 KHz
OBFIN 7.29 Hz
POINT 13107
FREQU 6002.40 Hz
SCANS 8
ACQTM 2.1837 sec
PD 15.0000 sec
PWL 5.00 usec
IRNUC 1H
CTEMP 30.0 c
SLVNT CDCL3
EXREF 0.00 ppm
BF 0.10 Hz
RGAIN 38

```

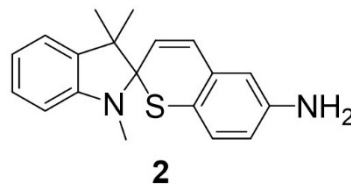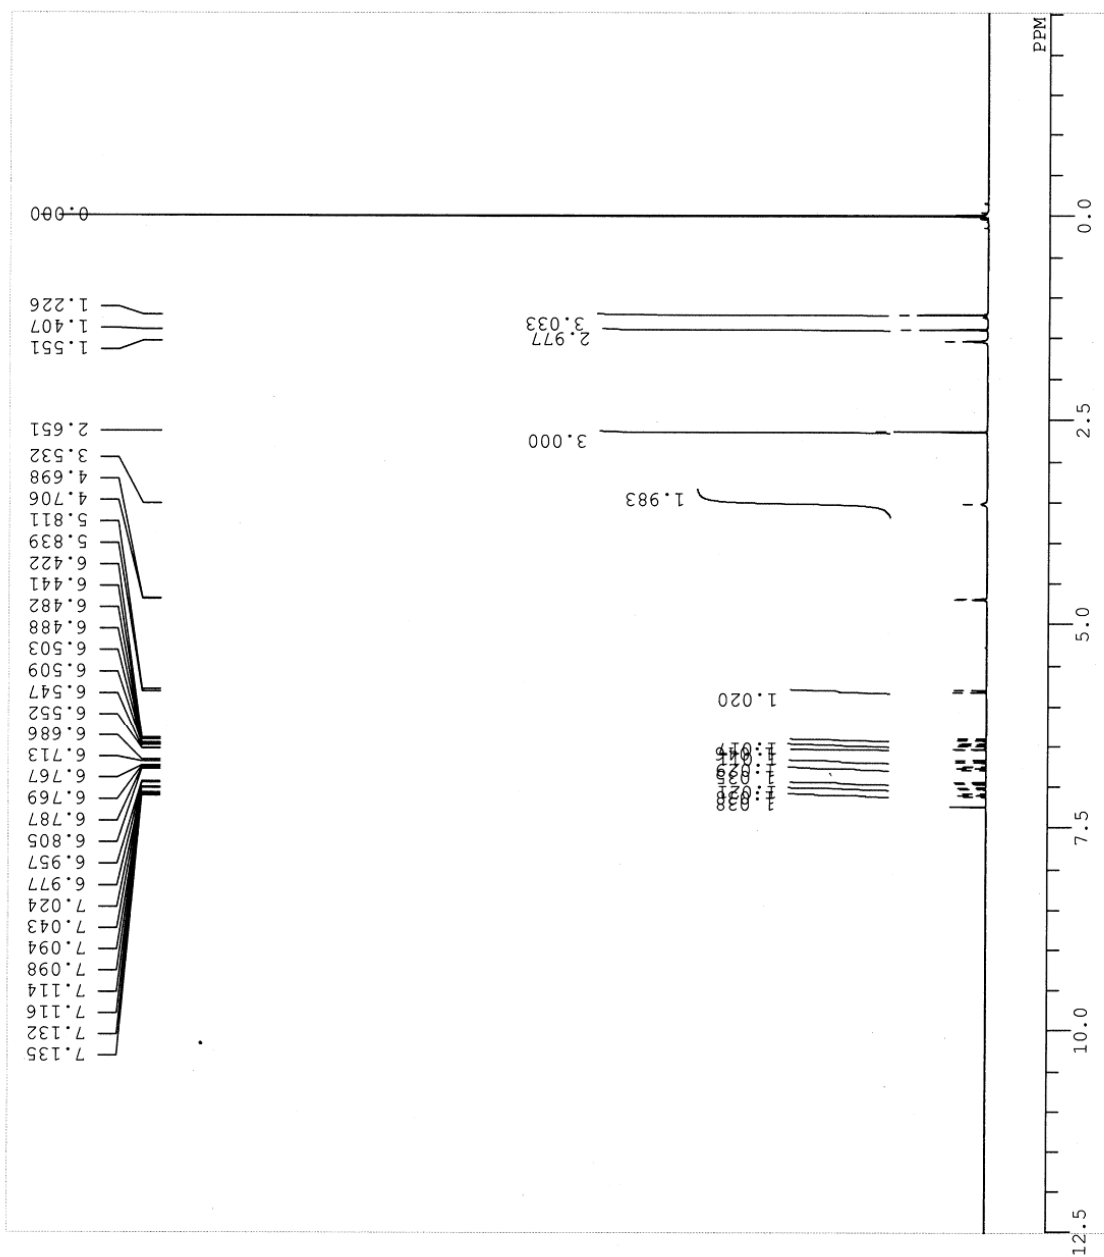

Fig. S1 <sup>1</sup>H NMR chart of **2** (CDCl<sub>3</sub>, 400 MHz)

DFILE ST-NH2\_Carbon-1-ii.als  
 COMNT single\_pulse decoupled gate  
 DATIM 2013-12-18 15:22:19  
 OBNUC 13C  
 EXMOD carbon\_jxp  
 OBFRQ 100.53 MHz  
 OBSET 5.35 KHz  
 OBFIN 5.86 Hz  
 POINT 26214  
 FREQU 25125.63 Hz  
 SCANS 1024  
 ACQTM 1.0433 sec  
 PD 2.0000 sec  
 PUL 2.87 usec  
 IRNUC 1H  
 CTEMP 30.0 C  
 SLVNT CDCL3  
 EXREF 0.00 ppm  
 BF 0.20 Hz  
 RGAIN 50

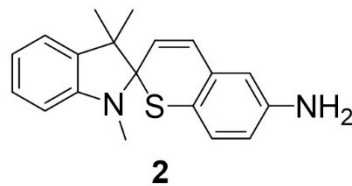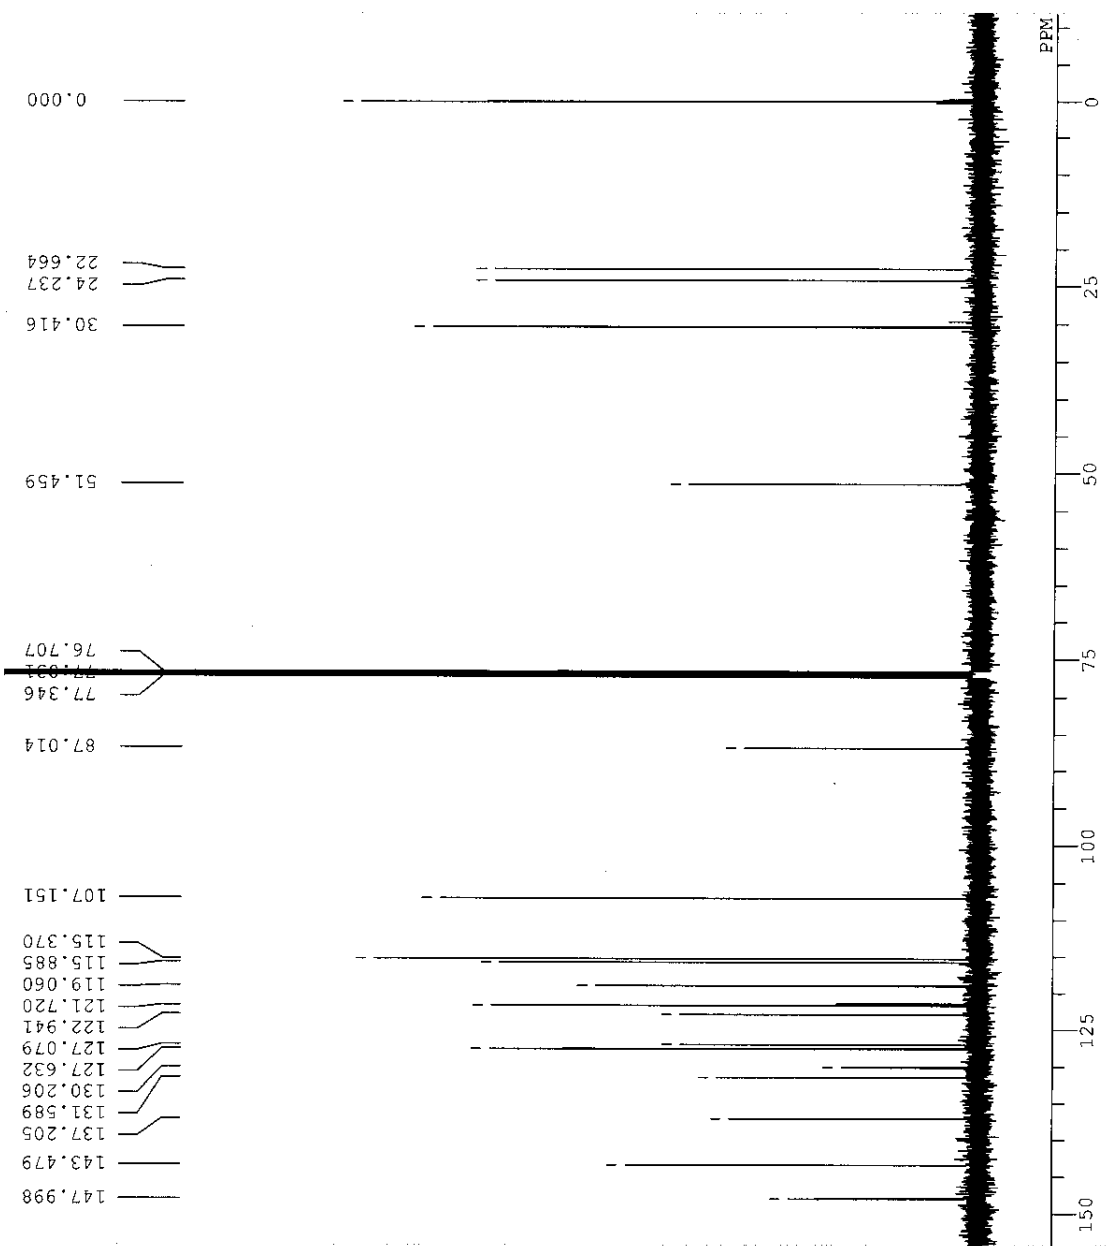

**Fig. S2**  $^{13}\text{C}$  NMR chart of **2** ( $\text{CDCl}_3$ , 101 MHz)

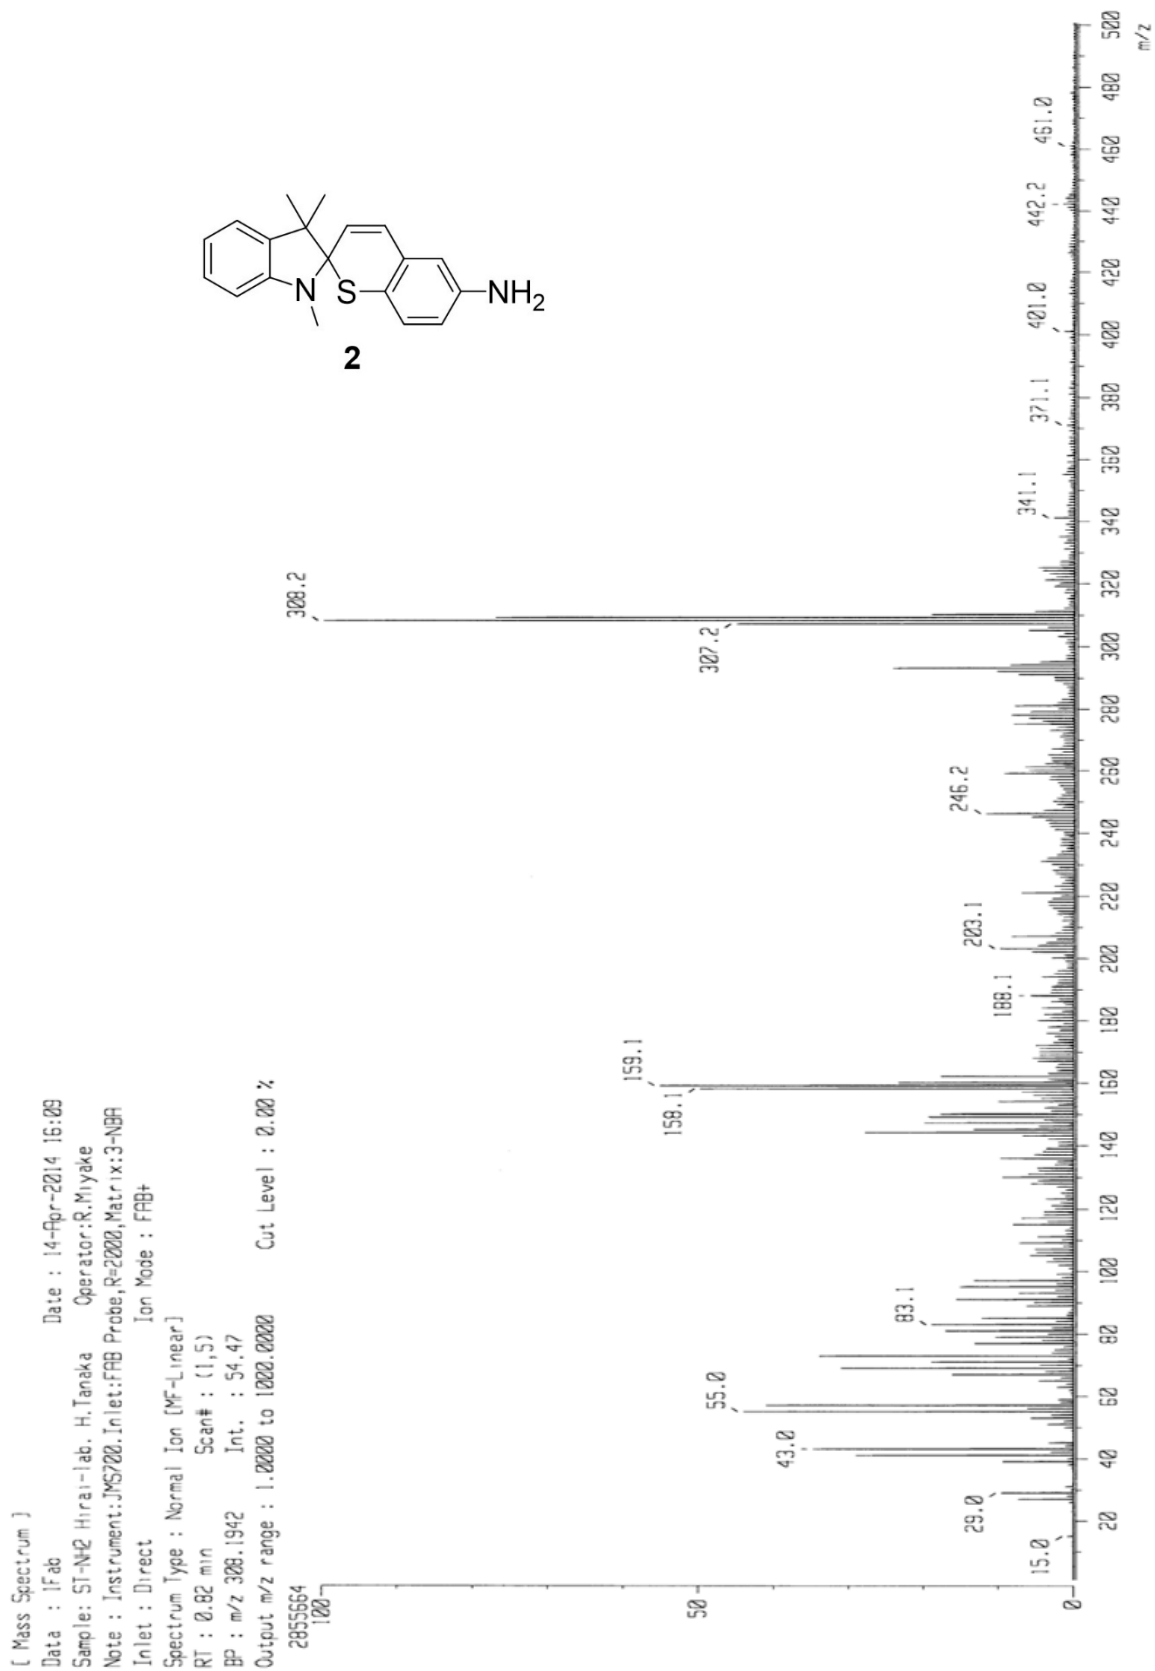

Fig. S3 FAB-MS chart of 2.

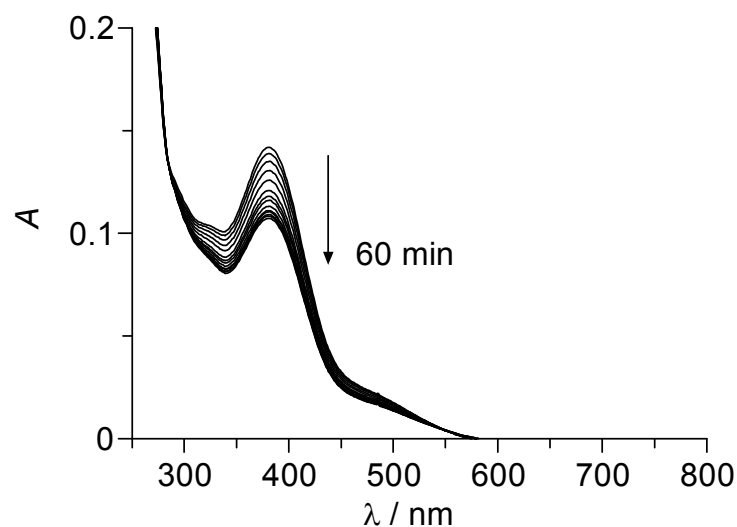

**Fig. S4** Change in absorption spectra of the solution containing the MC form of **2** (20 μM) during visible light irradiation (490 nm) for 60 min at 25 °C.

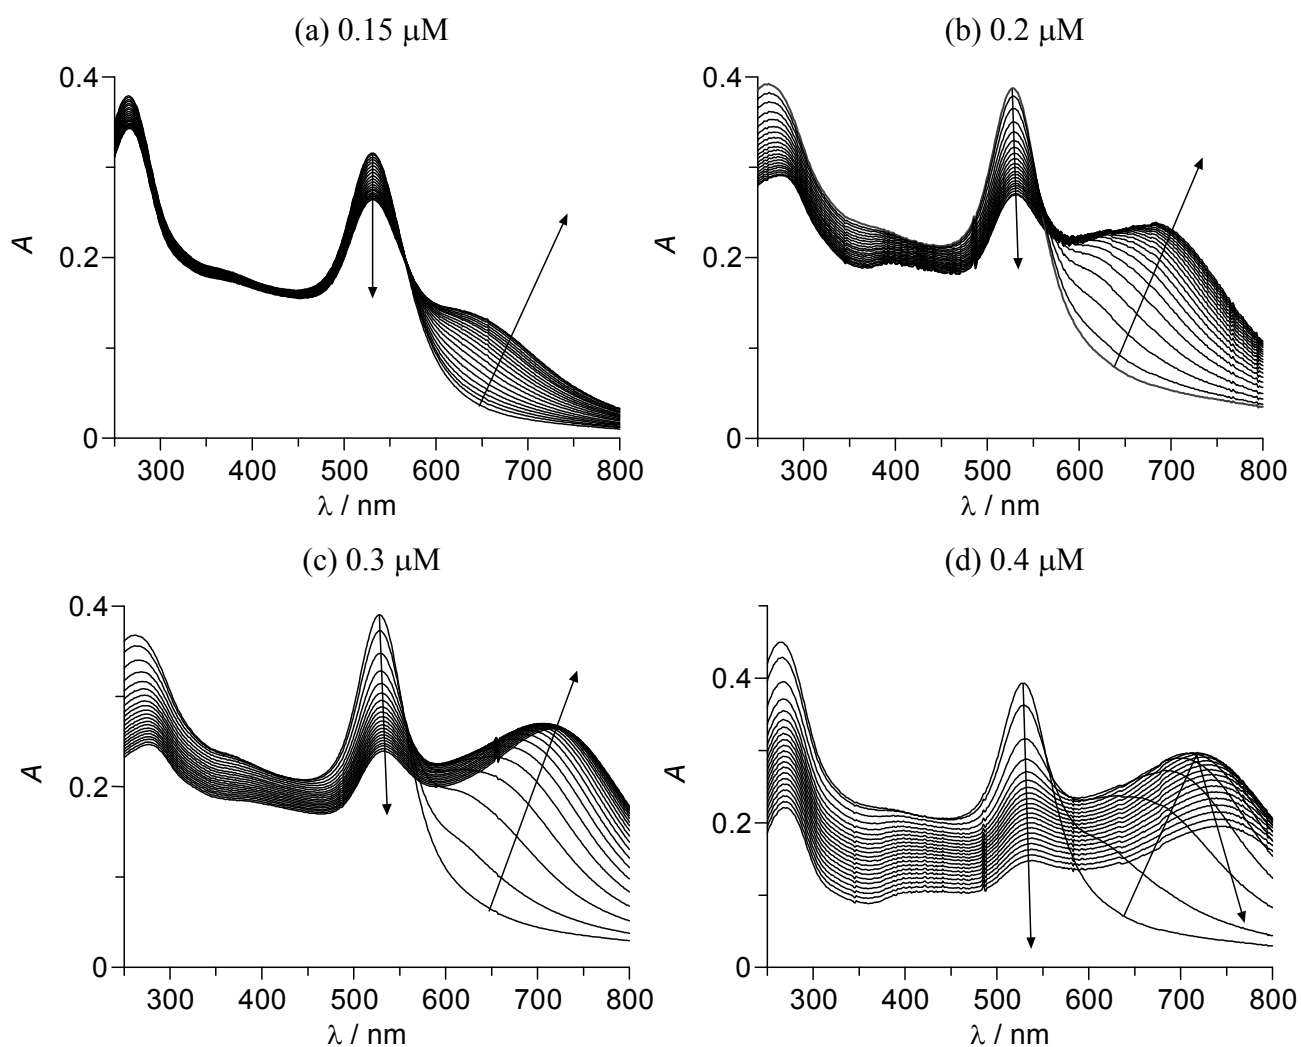

**Fig. S5** Absorption spectra of the solution containing AuNPs (0.12 nM) stabilized with 4.8 mM GABA during stirring with different amount of **2** in the dark condition.

**Table S1** Calculated electronic excitation properties for the SP and MC forms of **2**.<sup>[a]</sup>

| Species               | CIC <sup>[b]</sup>                  | $E / \text{eV} [\lambda / \text{nm}]$ | $\mu / \text{Debye}$ |         |         | $f$  |                    |
|-----------------------|-------------------------------------|---------------------------------------|----------------------|---------|---------|------|--------------------|
|                       |                                     |                                       | $\mu_x$              | $\mu_y$ | $\mu_z$ |      | $\mu_{\text{tot}}$ |
| $S_0 \rightarrow S_1$ | HOMO $\rightarrow$ LUMO (0.659)     | 3.3747 [367.39]                       | -0.536               | 0.705   | 1.262   | 0.08 | 0.0304             |
| $S_0 \rightarrow S_2$ | HOMO-1 $\rightarrow$ LUMO (0.691)   | 3.5742 [346.89]                       | 0.069                | 0.066   | 0.585   | 0.01 | 0.0048             |
| $S_0 \rightarrow S_3$ | HOMO $\rightarrow$ LUMO+2 (0.480)   | 4.4515 [278.52]                       | -0.251               | -0.116  | 0.006   | 0.00 | 0.0013             |
| $S_0 \rightarrow S_4$ | HOMO $\rightarrow$ LUMO+1 (0.482)   | 4.5404 [273.07]                       | 1.119                | 0.412   | -0.529  | 0.07 | 0.0293             |
| $S_0 \rightarrow S_5$ | HOMO-1 $\rightarrow$ LUMO+1 (0.491) | 4.5667 [271.50]                       | -1.357               | -0.431  | 0.637   | 0.11 | 0.0421             |
| $S_0 \rightarrow S_6$ | HOMO $\rightarrow$ LUMO+3 (0.495)   | 4.7975 [258.44]                       | 1.900                | 0.672   | 0.672   | 0.21 | 0.0821             |
| <hr/>                 |                                     |                                       |                      |         |         |      |                    |
| $S_0 \rightarrow S_1$ | HOMO $\rightarrow$ LUMO (0.604)     | 1.6298 [760.75]                       | 5.017                | 2.127   | -0.001  | 0.47 | 0.1835             |
| $S_0 \rightarrow S_2$ | HOMO-1 $\rightarrow$ LUMO (0.695)   | 1.8293 [677.76]                       | 0.006                | 0.000   | 0.020   | 0.00 | 0.0000             |
| $S_0 \rightarrow S_3$ | HOMO-2 $\rightarrow$ LUMO (0.614)   | 3.0205 [410.47]                       | -7.693               | -0.421  | -0.002  | 1.73 | 0.6799             |
| $S_0 \rightarrow S_4$ | HOMO-3 $\rightarrow$ LUMO (0.636)   | 3.2582 [380.52]                       | -3.177               | 1.450   | 0.002   | 0.38 | 0.1507             |

[a] Calculated at the DFT level (B3LYP/6-31Gd).

[b] CI expansion coefficients for the main orbital transitions.

Cartesian Coordinates (in Å) of **1**

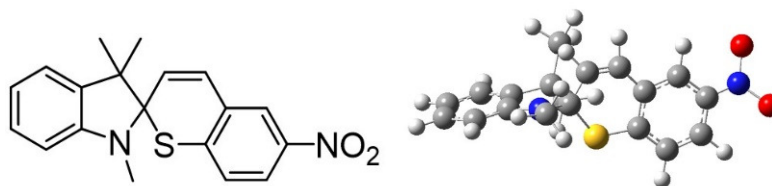

|   |           |           |           |   |           |           |           |
|---|-----------|-----------|-----------|---|-----------|-----------|-----------|
| C | 5.13999   | -1.660764 | 0.422032  | H | 5.84551   | -2.41574  | 0.763757  |
| C | 5.409473  | -0.924193 | -0.733199 | H | 6.326558  | -1.110021 | -1.290564 |
| C | 4.513341  | 0.047779  | -1.20403  | H | 4.730965  | 0.604086  | -2.112751 |
| C | 3.343249  | 0.259684  | -0.475391 | H | 3.749444  | -2.002293 | 2.049431  |
| C | 3.063028  | -0.473182 | 0.690823  | H | -1.676513 | 2.740231  | 0.675103  |
| C | 3.956629  | -1.430908 | 1.145351  | H | -1.918043 | -2.329792 | -1.600686 |
| N | 2.307429  | 1.172642  | -0.724222 | H | -4.34574  | -2.219986 | -1.098643 |
| C | 1.133575  | 0.754347  | 0.01067   | H | -3.780507 | 1.607095  | 0.793219  |
| C | 1.76714   | 0.052458  | 1.290812  | H | 1.380667  | -1.384464 | 2.856774  |
| S | 0.233165  | -0.549784 | -1.110574 | H | -0.073938 | -0.571027 | 2.271367  |
| C | -1.467658 | -0.426457 | -0.67673  | H | 0.681736  | -1.8532   | 1.299213  |
| C | -1.988979 | 0.7047    | 0.000278  | H | 2.726049  | 1.938698  | 1.911361  |
| C | -1.145454 | 1.842646  | 0.357054  | H | 1.21433   | 1.577477  | 2.775622  |
| C | -2.325479 | -1.466445 | -1.077228 | H | 2.693617  | 0.675049  | 3.15404   |
| C | -3.683521 | -1.413445 | -0.799589 | H | 3.137065  | 2.43471   | -2.164193 |
| C | -4.186232 | -0.302646 | -0.113506 | H | 2.029274  | 1.211841  | -2.839892 |
| C | -3.358846 | 0.748206  | 0.278166  | H | 1.387653  | 2.602035  | -1.93284  |
| C | 0.88217   | -1.005215 | 1.95756   | C | 0.195761  | 1.88787   | 0.308845  |
| C | 2.119717  | 1.137058  | 2.344001  | H | 0.693491  | 2.820124  | 0.576022  |
| C | 2.208502  | 1.883218  | -1.987275 | O | -6.033366 | 0.747584  | 0.804377  |
| N | -5.605305 | -0.236621 | 0.189337  | O | -6.329829 | -1.168672 | -0.179983 |

Cartesian Coordinates (in Å) of **2** (SP)

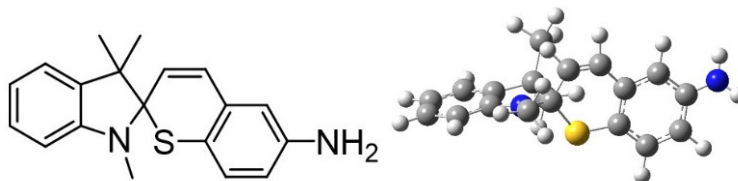

|   |           |           |           |   |           |           |           |
|---|-----------|-----------|-----------|---|-----------|-----------|-----------|
| C | 4.632207  | -1.613685 | -0.433346 | H | 5.345187  | -2.432939 | -0.504385 |
| C | 4.902197  | -0.394995 | -1.058691 | H | 5.827811  | -0.268668 | -1.618795 |
| C | 3.995664  | 0.674552  | -0.993755 | H | 4.214442  | 1.613943  | -1.49607  |
| C | 2.813901  | 0.484689  | -0.276239 | H | 3.228912  | -2.735332 | 0.780308  |
| C | 2.533266  | -0.737481 | 0.360914  | H | -2.233636 | 2.027409  | 1.91717   |
| C | 3.436929  | -1.785893 | 0.287865  | H | -2.43238  | -1.388479 | -2.453157 |
| N | 1.771285  | 1.389844  | -0.052228 | H | -4.82898  | -1.622651 | -1.919171 |
| C | 0.586798  | 0.650552  | 0.356152  | H | -4.300635 | 0.910613  | 1.52305   |
| C | 1.22421   | -0.592457 | 1.123866  | H | 0.857724  | -2.636857 | 1.722879  |
| S | -0.295179 | 0.113899  | -1.264181 | H | -0.603736 | -1.642891 | 1.657738  |
| C | -1.993408 | -0.106043 | -0.774163 | H | 0.138708  | -2.228352 | 0.155061  |
| C | -2.529559 | 0.550506  | 0.353419  | H | 2.159823  | 0.730052  | 2.619054  |
| C | -1.697987 | 1.402493  | 1.201428  | H | 0.644314  | -0.021255 | 3.166048  |
| C | -2.836912 | -0.879957 | -1.578727 | H | 2.12854   | -0.986653 | 3.060143  |
| C | -4.19123  | -1.012497 | -1.280008 | H | 2.587842  | 3.229766  | -0.607074 |
| C | -4.744051 | -0.374667 | -0.153138 | H | 1.56922   | 2.49085   | -1.870027 |
| C | -3.893988 | 0.403691  | 0.647111  | H | 0.823666  | 3.20726   | -0.42297  |
| C | 0.348761  | -1.848032 | 1.157008  | C | -0.356567 | 1.485329  | 1.178553  |
| C | 1.557555  | -0.183012 | 2.582977  | H | 0.136351  | 2.174202  | 1.864479  |
| C | 1.683084  | 2.639375  | -0.786111 | H | -6.481567 | 0.184957  | 0.760431  |
| N | -6.084048 | -0.563895 | 0.194167  | H | -6.694628 | -0.783812 | -0.592078 |



Cartesian Coordinates (in Å) of 2 (MC)

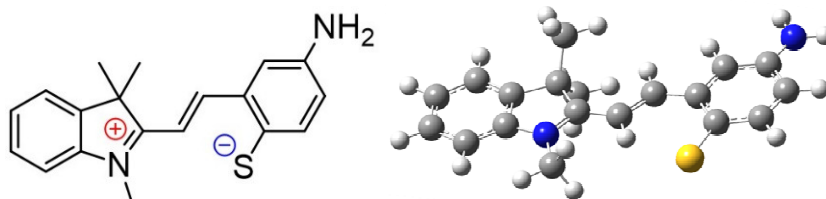

|   |           |           |           |   |           |           |           |
|---|-----------|-----------|-----------|---|-----------|-----------|-----------|
| C | -5.718536 | -0.930191 | -0.006308 | H | -6.628396 | -1.52745  | -0.008296 |
| C | -5.80446  | 0.466017  | -0.007771 | H | -6.780794 | 0.947382  | -0.010991 |
| C | -4.654342 | 1.263923  | -0.005307 | H | -4.740339 | 2.34797   | -0.006787 |
| C | -3.426677 | 0.606915  | -0.001237 | H | -4.408613 | -2.655604 | -0.001362 |
| C | -3.322002 | -0.786633 | -0.000011 | H | 0.454869  | 1.583854  | 0.001878  |
| C | -4.469909 | -1.567862 | -0.002428 | H | 0.98398   | -1.428673 | 0.004329  |
| N | -2.121399 | 1.15554   | 0.001704  | H | 5.275882  | 2.044127  | -0.004823 |
| C | -1.171818 | 0.194451  | 0.003625  | H | 6.5592    | -0.034565 | -0.007733 |
| C | -1.854756 | -1.181898 | 0.00416   | H | 2.910826  | -2.296076 | 0.001527  |
| C | 0.192039  | 0.532963  | 0.003361  | H | -0.459831 | -2.280899 | -1.298536 |
| C | 1.240133  | -0.372822 | 0.003426  | H | -1.735856 | -1.412957 | -2.17439  |
| C | 2.651639  | -0.142243 | 0.001924  | H | -2.118155 | -2.903711 | -1.292253 |
| C | 3.319762  | 1.142953  | 0.001362  | H | -0.466401 | -2.276629 | 1.317546  |
| C | 4.742214  | 1.096232  | -0.003119 | H | -2.125191 | -2.898166 | 1.306681  |
| C | 5.469199  | -0.074545 | -0.004828 | H | -1.7455   | -1.404009 | 2.184199  |
| C | 4.823342  | -1.342212 | -0.003001 | H | -1.257486 | 2.856335  | 0.890693  |
| C | 3.43665   | -1.340866 | 0.000458  | H | -2.773636 | 3.141432  | 0.005153  |
| N | 5.567459  | -2.498225 | -0.005098 | H | -1.263349 | 2.857633  | -0.891089 |
| C | -1.513644 | -1.990954 | -1.271748 | H | 5.122186  | -3.407875 | -0.001691 |
| C | -1.51984  | -1.985993 | 1.284986  | H | 6.579454  | -2.466428 | -0.008828 |
| C | -1.836226 | 2.587746  | 0.001538  | S | 2.562383  | 2.722701  | 0.001502  |
